# Supplementary material for: Reporting dose in complex self-management support interventions for long-term conditions: is it defined by researchers and received by participants? A systematic review
Source: HighWire-hosted journal article supplement (doi:10.1136/bmjopen-2021-056532), 2022-08-01
Supplement: bmjopen-2021-056532supp002_data_supplement.pdf [file bmjopen-2021-056532supp002_data_supplement.pdf]

Supplementary Figure 2. Reference list for the 82 eligible articles included in this systematic review.

1. Ackerman IN, Buchbinder R, Osborne RH. Challenges in evaluating an Arthritis Self-Management Program for people with hip and knee osteoarthritis in real-world clinical settings. *J Rheumatol*. 2012;39(5):1047-55.
2. Ambrosino JM, Fennie K, Whittemore R, Jaser S, Dowd MF, Grey M. Short-term effects of coping skills training in school-age children with type 1 diabetes. *Pediatric diabetes*. 2008;9(3 Pt 2):74-82.
3. Anvar N, Matlabi H, Safaiyan A, Allahverdi-pour H, Kolahi S. Effectiveness of self-management program on arthritis symptoms among older women: A randomized controlled trial study. *Health Care for Women International*. 2018;39(12):1326-39.
4. Bantum EOC, Albright CL, White KK, Berenberg JL, Layi G, Ritter PL, et al. Surviving and thriving with cancer using a Web-based health behavior change intervention: randomized controlled trial. *Journal of Medical Internet Research*. 2014;16(2):e54-12.
5. Berg CJ, Vanderpool RC, Getachew B, Payne JB, Johnson MF, Sandridge Y, Bierhoff J, Le L, Johnson R, Weber A, Patterson A. A hope-based intervention to address disrupted goal pursuits and quality of life among young adult cancer survivors. *Journal of Cancer Education*. 2020 Dec;35(6):1158-69.
6. Berry DC, Williams W, Hall EG, Heroux R, Bennett-Lewis T. Imbedding Interdisciplinary Diabetes Group Visits Into a Community-Based Medical Setting. *Diabetes Educator*. 2016;42(1):96-107.
7. Bersani FS, Biondi M, Coviello M, Fagiolini A, Majorana M, Minichino A, et al. Psychoeducational intervention focused on healthy living improves psychopathological severity and lifestyle quality in psychiatric patients: preliminary findings from a controlled study. *Journal of Mental Health*. 2017;26(3):271-5.
8. Bosworth HB, Olsen MK, Dudley T, Orr M, Goldstein MK, Datta SK, et al. Patient education and provider decision support to control blood pressure in primary care: a cluster randomized trial. *American heart journal*. 2009;157(3):450-6.
9. Breedland I, van Scheppingen C, Leijmsa M, Verheij-Jansen NP, van Weert E. Effects of a Group-Based Exercise and Educational Program on Physical Performance and Disease Self-Management in Rheumatoid Arthritis: A Randomized Controlled Study. *Physical Therapy*. 2011;91(6):879-93.
10. Brorsson AL, Leksell J, Andersson Franko M, Lindholm Olinder A. A person-centered education for adolescents with type 1 diabetes—A randomized controlled trial. *Pediatric Diabetes*. 2019;20(7):986-96.
11. Chamany S, Walker EA, Schechter CB, Gonzalez JS, Davis NJ, Ortega FM, et al. Telephone Intervention to Improve Diabetes Control: A Randomized Trial in the New York City A1c Registry. *Am J Prev Med*. 2015;49(6):832-41.
12. Chen L, Chen Y, Chen X, Shen X, Wang Q, Sun C. Longitudinal Study of Effectiveness of a Patient-Centered Self-Management Empowerment Intervention During Predischarge Planning on Stroke Survivors. *Worldviews on Evidence-Based Nursing*. 2018;15(3):197-205.
13. Chew BH, Vos RC, Stellato RK, Ismail M, Rutten GEHM. The effectiveness of an emotion-focused educational programme in reducing diabetes distress in adults with Type 2 diabetes mellitus (VEMOFIT): a cluster randomized controlled trial. *Diabetic Medicine*. 2018;35(6):750-9.
14. Christiansen CL, Miller MJ, Murray AM, Stephenson RO, Stevens-Lapsley JE, Hiatt WR, et al. Behavior-Change Intervention Targeting Physical Function, Walking, and Disability After Dysvascular Amputation: A Randomized Controlled Pilot Trial. *Archives of Physical Medicine and Rehabilitation*. 2018;99(11):2160-7.

15. Cook JA, Jonikas JA, Hamilton MM, Goldrick V, Steigman PJ, Grey DD, et al. Impact of wellness recovery action planning on service utilization and need in a randomized controlled trial. *Psychiatric Rehabilitation Journal*. 2013;36(4):250-7.
16. Corado K, Jain S, Morris S, Dube MP, Daar ES, He F, et al. Randomized Trial of a Health Coaching Intervention to Enhance Retention in Care: California Collaborative Treatment Group 594. *AIDS and behavior*. 2018;22(8):2698-710.
17. Daryabeygi-Khotbehsara, R., White, K.M., Djafarian, K., Islam, S.M.S., Catrledge, S., Ghaffari, M.P. and Keshavarz, S.A., 2021. Short-term effectiveness of a theory-based intervention to promote diabetes management behaviours among adults with type 2 diabetes in Iran: A randomised control trial. *International journal of clinical practice*, 75(5), p.e13994.
18. Dash D, Sebastian TM, Aggarwal M, Tripathi M. Impact of health education on drug adherence and self-care in people with epilepsy with low education. *Epilepsy & Behavior*. 2015 Mar 1;44:213-7.
19. Detaille S, Heerkens Y, Engels J, Gulden J, Dijk F. Effect Evaluation of a Self-Management Program for Dutch Workers with a Chronic Somatic Disease: A Randomized Controlled Trial. *Journal of Occupational Rehabilitation*. 2013;23(2):189-99.
20. Dinh HTT, Bonner A, Ramsbotham J, Clark R. Cluster randomized controlled trial testing the effectiveness of a self-management intervention using the teach-back method for people with heart failure. *Nursing & Health Sciences*. 2019;21(4):436-44.
21. Dziedzic K, Nicholls E, Hill S, Hammond A, Handy J, Thomas E, et al. Self-management approaches for osteoarthritis in the hand: A 2x2 factorial randomised trial. *Annals of the Rheumatic Diseases*. 2015;74(1):108-18.
22. Ehde DM, Elzea JL, Verrall AM, Gibbons LE, Smith AE, Amtmann D. Efficacy of a Telephone-Delivered Self-Management Intervention for Persons With Multiple Sclerosis: A Randomized Controlled Trial With a One-Year Follow-Up. *Arch Phys Med Rehabil*. 2015;96(11):1945-58 e2.
23. Fernández Guijarro S, Pomarol-Clotet E, Rubio Muñoz MC, Miguel García C, Egea López E, Fernández Guijarro R, et al. Effectiveness of a community-based nurse-led lifestyle-modification intervention for people with serious mental illness and metabolic syndrome. *International Journal of Mental Health Nursing*. 2019;28(6):1328-37.
24. Ferrone M, Masciantonio MG, Malus N, Stitt L, O'Callahan T, Roberts Z, et al. The impact of integrated disease management in high-risk COPD patients in primary care. *NPJ primary care respiratory medicine*. 2019;29(1):8.
25. Forjuoh SN BJ, Huber Jr JC, Vuong AM, Adepoju OE, Helduser JW, Begaye DS, Robertson A, Moudouni DM, Bonner TJ, McLeroy KR. Behavioral and technological interventions targeting glycemic control in a racially/ethnically diverse population: a randomized controlled trial. *BMC Public Health*. 2014;Dec 1;14(1):71.
26. Fukuoka Y, Hosomi N, Hyakuta T, Omori T, Ito Y, Uemura J, et al. Effects of a Disease Management Program for Preventing Recurrent Ischemic Stroke. *Stroke*. 2019;50(3):705-12.
27. Gallinat C, Moessner M, Haenssle HA, Winkler JK, Backenstrass M, Bauer S. An internet-based self-help intervention for skin picking (SaveMySkin): Pilot randomized controlled trial. *Journal of medical Internet research*. 2019;21(9):e15011.
28. Geremia C, Fornari A, Tschiedel B. Comparison of the effect of a compact vs a conventional, long-term education program on metabolic control in children and adolescents with type 1 diabetes: A pilot, randomized clinical trial. *Pediatric Diabetes*. 2019;20(6):778-84.
29. Goldberg RW, Dickerson F, Lucksted A, Brown CH, Weber E, Tenhula WN, et al. Living well: An intervention to improve self-management of medical illness for individuals with serious mental illness. *Psychiatric Services*. 2013;64(1):51-7.
30. Golshahi J, Ahmadzadeh H, Sadeghi M, Mohammadifard N, Pourmoghaddas A. Effect of self-care education on lifestyle modification, medication adherence and blood pressure in hypertensive adults: Randomized controlled clinical trial. *Advanced biomedical research*. 2015;4:204.

31. Grammatopoulou E, Skordilis EK, Haniotou A, John Z, Athanasopoulos S. The effect of a holistic self-management plan on asthma control. *Physiotherapy Theory & Practice*. 2017;33(8):622-33.
32. Groessl EJ, Weingart KR, Stepnowsky CJ, Gifford AL, Asch SM, Ho SB. The hepatitis C self-management programme: a randomized controlled trial. *J Viral Hepat*. 2011;18(5):358-68.
33. Gronning K, Skomsvoll JF, Rannestad T, Steinsbekk A. The effect of an educational programme consisting of group and individual arthritis education for patients with polyarthritis--a randomised controlled trial. *Patient Educ Couns*. 2012;88(1):113-20.
34. Harel-Katz H, Adar T, Milman U, Carmeli E. Examining the feasibility and effectiveness of a culturally adapted participation-focused stroke self-management program in a day-rehabilitation setting: A randomized pilot study. *Topics in stroke rehabilitation*. 2020 Nov 16;27(8):577-89.
35. Harrington R, Taylor G, Hollinghurst S, Reed M, Kay H, Wood VA. A community-based exercise and education scheme for stroke survivors: a randomized controlled trial and economic evaluation. *Clinical Rehabilitation*. 2010;24(1):3-15.
36. Härter M, Dirmaier J, Dwinger S, Kriston L, Herbarth L, Siegmund-Schultze E, Bermejo I, Matschinger H, Heider D, König HH. Effectiveness of telephone-based health coaching for patients with chronic conditions: a randomised controlled trial. *PloS one*. 2016 Sep 15;11(9):e0161269.
37. Heutink M, Post MW, Bongers-Janssen HM, Dijkstra CA, Snoek GJ, Spijkerman DC, et al. The CONECSE trial: Results of a randomized controlled trial of a multidisciplinary cognitive behavioral program for coping with chronic neuropathic pain after spinal cord injury. *Pain*. 2012;153(1):120-8.
38. Hewlett S, Ambler N, Almeida C, Cliss A, Hammond A, Kitchen K, et al. Self-management of fatigue in rheumatoid arthritis: A randomised controlled trial of group cognitive-behavioural therapy. *Annals of the Rheumatic Diseases*. 2011;70(6):1060-7.
39. Holm PM, Schröder HM, Wernbom M, Skou ST. Low-dose strength training in addition to neuromuscular exercise and education in patients with knee osteoarthritis in secondary care--a randomized controlled trial. *Osteoarthritis and Cartilage*. 2020 Jun 1;28(6):744-54.
40. Holt RI, Gossage-Worrall R, Hind D, Bradburn MJ, McCrone P, Morris T, et al. Structured lifestyle education for people with schizophrenia, schizoaffective disorder and first-episode psychosis (STEPWISE): randomised controlled trial. *British Journal of Psychiatry*. 2019;214(2):63-73.
41. Houlihan BV, Brody M, Everhart-Skeels S, Pernigotti D, Burnett S, Zazula J, Green C, Hasiotis S, Belliveau T, Seetharama S, Rosenblum D. Randomized trial of a peer-led, telephone-based empowerment intervention for persons with chronic spinal cord injury improves health self-management. *Archives of physical medicine and rehabilitation*. 2017 Jun 1;98(6):1067-76.
42. House A, Bryant L, Russell AM, Wright-hughes A, Graham L, Walwyn R, et al. Randomized controlled feasibility trial of supported self-management in adults with Type 2 diabetes mellitus and an intellectual disability: OK Diabetes. *Diabetic Medicine*. 2018;35(6):776-88.
43. Jaipakdee J, Jiamjarasrangsri W, Lohsoonthorn V, Lertmaharit S. Effectiveness of a self-management support program for Thais with type 2 diabetes: Evaluation according to the RE-AIM framework. *Nursing & Health Sciences*. 2015;17(3):362-9.
44. James EL, Stacey FG, Chapman K, Boyes AW, Burrows T, Girgis A, et al. Impact of a nutrition and physical activity intervention (ENRICH: Exercise and Nutrition Routine Improving Cancer Health) on health behaviors of cancer survivors and carers: a pragmatic randomized controlled trial. *BMC Cancer*. 2015;15:710.
45. Jiang XJ, Jiang H, Lu YH, Liu SL, Wang JP, Tang RS, et al. The effectiveness of a self-efficacy-focused structured education programme on adults with type 2 diabetes: A multicentre randomised controlled trial. *Journal of Clinical Nursing (John Wiley & Sons, Inc)*. 2019;28(17/18):3299-309.

46. John H, Hale ED, Treharne GJ, Kitas GD, Carroll D. A randomized controlled trial of a cognitive behavioural patient education intervention vs. a traditional information leaflet to address the cardiovascular aspects of rheumatoid disease. *Rheumatology*. 2013;52(1):81-90.
47. Ju C, Shi R, Yao L, Ye X, Jia M, Han J, et al. Effect of peer support on diabetes distress: a cluster randomized controlled trial. *Diabetic Medicine*. 2018;Jun;35(6):770-5.
48. Kasteleyn MJ, Vos RC, Rijken M, Schellevis FG, Rutten GEHM. Effectiveness of tailored support for people with Type 2 diabetes after a first acute coronary event: a multicentre randomized controlled trial (the Diacourse-ACE study). *Diabetic Medicine*. 2016;33(1):125-33.
49. Kessler R, Casan-Clara P, Koehler D, Tognella S, Viejo JL, Dal Negro RW, et al. COMET: a multicomponent home-based disease-management programme versus routine care in severe COPD. *Eur Respir J*. 2018;51(1).
50. Kooijmans H, Post MW, Stam HJ, van der Woude LH, Spijkerman DC, Snoek GJ, et al. Effectiveness of a self-management intervention to promote an active, lifestyle in persons with long-term spinal cord injury: The HABITS randomized clinical trial. *Neurorehabilitation and Neural Repair*. 2017;31(12):991-1004.
51. Laakkonen ML, Kautiainen H, Holtta E, Savikko N, Tilvis RS, Strandberg TE, et al. Effects of self-management groups for people with dementia and their spouses - Randomized controlled trial. *Journal - American Geriatrics Society*. 2016;64(4):752-60.
52. Lopez-Lopez L, Valenza MC, Rodriguez-Torres J, Torres-Sanchez I, Granados-Santiago M, Valenza-Demet G. Results on health-related quality of life and functionality of a patient-centered self-management program in hospitalized COPD: a randomized control trial. *Disability and Rehabilitation*. 2020 Dec 3;42(25):3687-95.
53. Luciano JV, Martinez N, Penarrubia-Maria MT, Fernandez-Vergel R, Garcia-Campayo J, Verduras C, et al. Effectiveness of a psychoeducational treatment program implemented in general practice for Fibromyalgia patients: A randomized controlled trial. *Clinical Journal of Pain*. 2011;27(5):383-91.
54. Ludman EJ, Simon GE, Grothaus LC, Richards JE, Whiteside U, Stewart C. Organized Self-Management Support Services for Chronic Depressive Symptoms: A Randomized Controlled Trial. *Psychiatr Serv*. 2016;67(1):29-36.
55. Manning VL, Hurley MV, Scott DL, Coker B, Choy E, Bearne LM. Education, self-management, and upper extremity exercise training in people with rheumatoid arthritis: a randomized controlled trial. *Arthritis Care Res (Hoboken)*. 2014;66(2):217-27.
56. Mansouri A, Baraz S, Elahi N, Malehi AS, Saberipour B. The effect of an educational program based on Roy's adaptation model on the quality of life of patients suffering from heart failure: A clinical trial study. *Japan Journal of Nursing Science*. 2019;Oct;16(4):459-67.
57. Markle-Reid M, Ploeg J, Fraser KD, Fisher KA, Bartholomew A, Griffith LE, et al. Community Program Improves Quality of Life and Self-Management in Older Adults with Diabetes Mellitus and Comorbidity. *Journal - American Geriatrics Society*. 2018;66(2):263-73.
58. Marsden D, Quinn R, Pond N, Golledge R, Neilson C, White J, et al. A multidisciplinary group programme in rural settings for community-dwelling chronic stroke survivors and their carers: a pilot randomized controlled trial. *Clinical Rehabilitation*. 2010;24(4):328-41.
59. Miller J, MacDermid JC, Walton DM, Richardson J. Chronic pain self-management support with pain science education and exercise (COMMENCE) for people with chronic pain and multiple comorbidities: a randomized controlled trial. *Archives of Physical Medicine and Rehabilitation*. 2020 May 1;101(5):750-61.
60. Minshall C, Castle DJ, Thompson DR, Pascoe M, Cameron J, McCabe M, Apputhurai P, Knowles SR, Jenkins Z, Ski CF. A psychosocial intervention for stroke survivors and carers: 12-month outcomes of a randomized controlled trial. *Topics in stroke rehabilitation*. 2020 Nov 16;27(8):563-76.
61. Mohammadpour A, Rahmati Sharghi N, Khosravan S, Alami A, Akhond M. The effect of a supportive educational intervention developed based on the Orem's self-care theory on

- the self-care ability of patients with myocardial infarction: a randomised controlled trial. *Journal of Clinical Nursing* (John Wiley & Sons, Inc). 2015;24(11-12):1686-92.
62. Muchiri J, Gericke G, Rheeder P. Effect of a nutrition education programme on clinical status and dietary behaviours of adults with type 2 diabetes in a resource-limited setting in South Africa: a randomised controlled trial. *Public health nutrition*. 2016;Jan;19(1):142-55.
63. Nguyen NT, Douglas C, Bonner A. Effectiveness of self-management programme in people with chronic kidney disease: A pragmatic randomized controlled trial. *Journal of Advanced Nursing* (John Wiley & Sons, Inc). 2019;75(3):652-64.
64. O'Toole L, Connolly D, Boland F, Smith SM. Effect of the OPTIMAL programme on self-management of multimorbidity in primary care: a randomised controlled trial. *British Journal of General Practice*. 2021 Apr 1;71(705):e303-11.
65. Perez-Escamilla R, Damio G, Chhabra J, Fernandez ML, Segura-Perez S, Vega-Lopez S, et al. Impact of a community health workers-led structured program on blood glucose control among latinos with type 2 diabetes: the DIALBEST trial. *Diabetes care*. 2015;38(2):197-205.
66. Pinxsterhuis I, Sandvik L, Strand EB, Bautz-Holter E, Sveen U. Effectiveness of a group-based self-management program for people with chronic fatigue syndrome: a randomized controlled trial. *Clinical Rehabilitation*. 2017;31(1):93-103.
67. Ridsdale L, Wojewodka G, Robinson EJ, Noble AJ, Morgan M, Taylor SJC, et al. The effectiveness of a group self-management education course for adults with poorly controlled epilepsy, SMILE (UK): A randomized controlled trial. *Epilepsia*. 2018;59(5):1048-61.
68. Rothschild SK, Martin MA, Swider SM, Lynas CMT, Janssen I, Avery EF, et al. Mexican American Trial of Community Health Workers: A Randomized Controlled Trial of a Community Health Worker Intervention for Mexican Americans With Type 2 Diabetes Mellitus. *American Journal of Public Health*. 2014;104(8):1540-8.
69. Sajatovic M, Tatsuoka C, Welter E, Colon-Zimmermann K, Blixen C, Perzynski AT, et al. A Targeted Self-Management Approach for Reducing Stroke Risk Factors in African American Men Who Have Had a Stroke or Transient Ischemic Attack. *American Journal of Health Promotion*. 2018;32(2):282-93.
70. Salyers MP, McGuire AB, Kukia M, Fukui S, Lysaker PH, Mueser KT. A randomized controlled trial of illness management and recovery with an active control group. *Psychiatric Services*. 2014;65(8):1005-11.
71. Smeulders ES, van Haastregt JC, Ambergen T, Uszko-Lencer NH, Janssen-Boyne JJ, Gorgels AP, et al. Nurse-led self-management group programme for patients with congestive heart failure: randomized controlled trial. *Journal of Advanced Nursing*. 2010;66(7):1487-99.
72. Spencer MS, Rosland A-M, Kieffer EC, Sinco BR, Valerio M, Palmisano G, et al. Effectiveness of a Community Health Worker Intervention Among African American and Latino Adults With Type 2 Diabetes: A Randomized Controlled Trial. *American Journal of Public Health*. 2011;101(12):2253-60.
73. Still CH, Margevicius SP, Wright Jr JT, Ruksakulpiwat S, Moore SM. A Pilot Study Evaluating the Effects of a Technology-Based and Positive Psychological Training Intervention on Blood Pressure in African Americans With Hypertension. *Journal of Primary Care & Community Health*. 2021 Dec;12:21501327211056186.
74. Stuijbergen AK, Blozis SA, Becker H, Phillips L, Timmerman G, Kullberg V, et al. A randomized controlled trial of a wellness intervention for women with fibromyalgia syndrome. *Clinical Rehabilitation*. 2010;24(4):305-18.
75. Swoboda CM, Miller CK, Wills CE. Setting Single or Multiple Goals for Diet and Physical Activity Behaviors Improves Cardiovascular Disease Risk Factors in Adults With Type 2 Diabetes. *Diabetes Educator*. 2016;42(4):429-43.
76. Taggart L, Truesdale M, Carey ME, Martin-Stacey L, Scott J, Bunting B, et al. Pilot feasibility study examining a structured self-management diabetes education programme, DESMOND- ID, targeting HbA1c in adults with intellectual disabilities. *Diabetic Medicine*. 2018;35(1):137-46.

77. Thoolen BJ, De Ridder D, Bensing J, Gorter K, Rutten G. Beyond good intentions: the role of proactive coping in achieving sustained behavioural change in the context of diabetes management. *Psychology & Health*. 2009;24(3):237-54.
78. van der Meer V, Bakker MJ, van den Hout WB, Rabe KF, Sterk PJ, Kievit J, et al. Internet-based self-management plus education compared with usual care in asthma: A randomized trial. *Annals of Internal Medicine*. 2009;151(2):110-20.
79. van Erp RM, Huijnen IP, Ambergen AW, Verbunt JA, Smeets RJ. Biopsychosocial primary care versus physiotherapy as usual in chronic low back pain: results of a pilot-randomised controlled trial. *European Journal of Physiotherapy*. 2021 Jan 2;23(1):3-10.
80. Van Rooijen AJ, Viviers CM, Becker PJ. A daily physical activity and diet intervention for individuals with type 2 diabetes mellitus: A randomized controlled trial. *South African Journal of Physiotherapy*. 2010;66(2):9-16.
81. Vos RC, Heusden L, Eikelenboom NWD, Rutten GEHM. Theory-based diabetes self-management education with pre-selection of participants: a randomized controlled trial with 2.5 years' follow-up (ELDES Study). *Diabetic Medicine*. 2019;36(7):827-35.
82. Walker EA, Shmukler C, Ullman R, Blanco E, Scollan-Koliopoulus M, Cohen HW. Results of a successful telephonic intervention to improve diabetes control in urban adults: a randomized trial. *Diabetes Care*. 2011;34(1):2-7.
83. Walsh N, Jones L, Phillips S, Thomas R, Odoni LO, Palmer S, Cramp F, Pollock J, Hurley M. Facilitating activity and self-management for people with arthritic knee, hip or lower back pain (FASA): a cluster randomised controlled trial. *Musculoskeletal Science and Practice*. 2020 Dec 1;50:102271.
84. Wang W, Jiang Y, He HG, Koh KW. A randomised controlled trial on the effectiveness of a home-based self-management programme for community-dwelling patients with myocardial infarction. *Eur J Cardiovasc Nurs*. 2016;15(6):398-408.
85. Wang W, Lim JY, Lopez V, Wu Vivien X, Lee CH, He HG, et al. The effect of a self-help psychoeducation programme for people with coronary heart disease: A randomized controlled trial. *Journal of Advanced Nursing (John Wiley & Sons, Inc)*. 2018;74(10):2416-26.
86. Weibel AR. Testing a peer-based symptom management intervention for women living with HIV/AIDS. *AIDS Care*. 2010;22(9):1029-40.
87. Wegener ST, Mackenzie EJ, Ephraim P, Ehde D, Williams R. Self-management improves outcomes in persons with limb loss. *Archives of Physical Medicine and Rehabilitation*. 2009;90(3):373-80.
88. Wolf TJ, Spiers MJ, Doherty M, Leary EV. The effect of self-management education following mild stroke: an exploratory randomized controlled trial. *Topics in Stroke Rehabilitation*. 2017;24(5):345-52.
89. Wu CJ, Sung HC, Chang AM, Atherton J, Kostner K, McPhail SM. Cardiac-diabetes self-management program for Australians and Taiwanese: A randomized blocked design study. *Nursing & Health Sciences*. 2017;19(3):307-15.
90. Wu SF, Lee MC, Hsieh NC, Lu KC, Tseng HL, Lin LJ. Effectiveness of an innovative self-management intervention on the physiology, psychology, and management of patients with pre-end-stage renal disease in Taiwan: A randomized, controlled trial. *Japan Journal of Nursing Science*. 2018;15(4):272-84.
91. Yip YB, Sit JW, Wong DY, Chong SY, Chung LH. A 1-year follow-up of an experimental study of a self-management arthritis programme with an added exercise component of clients with osteoarthritis of the knee. *Psychology, Health and Medicine*. 2008 Aug 1;13(4):402-14.
92. Young KW. A randomized control study on psycho-education group on improving health-related quality of life of Chinese persons with major neurocognitive disorder. *Clinical gerontologist*. 2016 Oct 19;39(5):449-67.
93. Zakrisson AB, Theander K, Arne M, Hasselgren M, Lisspers K, Ställberg B. A complex intervention of self-management for patients with COPD or CHF in primary care improved performance and satisfaction with regard to own selected activities; A longitudinal follow-up. *Journal of Advanced Nursing (John Wiley & Sons, Inc)*. 2019;75(1):175-86.

94. Zhang AY, Fu AZ. Cost-effectiveness of a behavioral intervention for persistent urinary incontinence in prostate cancer patients. *Psycho-Oncology*. 2016 Apr;25(4):421-7.
