# Supplementary material for: Reporting dose in complex self-management support interventions for long-term conditions: is it defined by researchers and received by participants? A systematic review
Source: HighWire-hosted journal article supplement (doi:10.1136/bmjopen-2021-056532), 2022-08-01
Supplement: bmjopen-2021-056532supp004_data_supplement.pdf [file bmjopen-2021-056532supp004_data_supplement.pdf]

**Study Details:**

|                             |                                                                                                                                                                                                                                                                                                                                                                                                                       |
|-----------------------------|-----------------------------------------------------------------------------------------------------------------------------------------------------------------------------------------------------------------------------------------------------------------------------------------------------------------------------------------------------------------------------------------------------------------------|
| Study Title                 |                                                                                                                                                                                                                                                                                                                                                                                                                       |
| Reference No.               |                                                                                                                                                                                                                                                                                                                                                                                                                       |
| Data Extractor              |                                                                                                                                                                                                                                                                                                                                                                                                                       |
| Year, Author, Country, Link | Year after 2008?: Yes <input type="checkbox"/> No <input type="checkbox"/><br>TIDieR checklist (2014): Before <input type="checkbox"/> After <input type="checkbox"/>                                                                                                                                                                                                                                                 |
| Pre-extraction Screening    | Needs translating: Yes <input type="checkbox"/> No <input type="checkbox"/><br><br>RCT: Yes <input type="checkbox"/> No <input type="checkbox"/><br><br>Self-management intervention: Yes <input type="checkbox"/> No <input type="checkbox"/><br><br>Participants with LTCs: Yes <input type="checkbox"/> No <input type="checkbox"/><br><br>Ongoing study: Yes <input type="checkbox"/> No <input type="checkbox"/> |
| Research Question / Aim     |                                                                                                                                                                                                                                                                                                                                                                                                                       |

**Methods:**

|                               |                                                                                                                                                                                                                                                                                                                                                                                                                                                                                                                                                                                                                                                                                                           |
|-------------------------------|-----------------------------------------------------------------------------------------------------------------------------------------------------------------------------------------------------------------------------------------------------------------------------------------------------------------------------------------------------------------------------------------------------------------------------------------------------------------------------------------------------------------------------------------------------------------------------------------------------------------------------------------------------------------------------------------------------------|
| Study Design                  | Participant Characteristics:                                                                                                                                                                                                                                                                                                                                                                                                                                                                                                                                                                                                                                                                              |
|                               | RCT details e.g. clusters, unclear:                                                                                                                                                                                                                                                                                                                                                                                                                                                                                                                                                                                                                                                                       |
|                               | How is the control arm described:                                                                                                                                                                                                                                                                                                                                                                                                                                                                                                                                                                                                                                                                         |
|                               | Number of centres:<br>Single centre <input type="checkbox"/> Multi-centre <input type="checkbox"/> Unclear <input type="checkbox"/>                                                                                                                                                                                                                                                                                                                                                                                                                                                                                                                                                                       |
| Intervention Summary Features | CDSMP <input type="checkbox"/> ASMP <input type="checkbox"/> EPP <input type="checkbox"/> Other <input type="checkbox"/> Specify if known<br><br>Disease specific <input type="checkbox"/> or Generic <input type="checkbox"/><br>LTCs included:<br><br>Delivered by: Health care professional <input type="checkbox"/> Lay person <input type="checkbox"/> Other <input type="checkbox"/> Specify if known<br><br>Individual one-to-one sessions: Yes <input type="checkbox"/> No <input type="checkbox"/><br><br>Group sessions: Yes <input type="checkbox"/> No <input type="checkbox"/> Number in group:<br>Face-to-Face sessions <input type="checkbox"/> / Remote sessions <input type="checkbox"/> |

|                                                                                                                                           |                                                                                                                                                                                                                                                                                                                                                                                                                                                                                                                                                                 |
|-------------------------------------------------------------------------------------------------------------------------------------------|-----------------------------------------------------------------------------------------------------------------------------------------------------------------------------------------------------------------------------------------------------------------------------------------------------------------------------------------------------------------------------------------------------------------------------------------------------------------------------------------------------------------------------------------------------------------|
|                                                                                                                                           | <p>Location where is the intervention delivered:<br/>         Inpatient <input type="checkbox"/>    Outpatient <input type="checkbox"/>    Community Based <input type="checkbox"/>    Home <input type="checkbox"/><br/>         Telephone <input type="checkbox"/>    Web-based <input type="checkbox"/>    Unclear <input type="checkbox"/>    Other <input type="checkbox"/> Specify if known</p> <p>Description:</p> <p>Any necessary components for adherence:</p>                                                                                        |
| <p>Dose of Intervention</p> <p>Adherence and compliance may be used synonymously, but the distinction and data needs to be teased out</p> | <p>Maximum dose:<br/>         Number of sessions:    Session Duration (hours):    Total hours:<br/>         Duration intervention delivered over:</p> <p>Anticipated clinically effective dose:<br/>         Number of sessions:    Session Duration (hours):    Total hours:<br/>         How clinically effective dose decided by authors:</p> <p>Author comments on Adherence (the number of sessions participants attended):</p> <p>Author comments on Compliance (the number of sessions participants need to attend to be including in the analysis):</p> |
| <p>Fidelity of Intervention</p>                                                                                                           | <p>Did the study describe attempts to ensure fidelity of the interventions i.e. what was delivered was what was intended to be delivered: Yes <input type="checkbox"/> No <input type="checkbox"/> Not stated/unclear <input type="checkbox"/><br/>         If Yes, specify:</p> <p>Comments / Additional details:</p>                                                                                                                                                                                                                                          |

**Results:**

| Participants         |                                                                                                                                                                                                                                                                                                                                                                    | Number | Age (mean, SD) | SES (add measure used) | Ethnicity (% white) | Gender (% female) |
|----------------------|--------------------------------------------------------------------------------------------------------------------------------------------------------------------------------------------------------------------------------------------------------------------------------------------------------------------------------------------------------------------|--------|----------------|------------------------|---------------------|-------------------|
|                      | Intervention:                                                                                                                                                                                                                                                                                                                                                      |        |                |                        |                     |                   |
|                      | Control:                                                                                                                                                                                                                                                                                                                                                           |        |                |                        |                     |                   |
|                      | All:                                                                                                                                                                                                                                                                                                                                                               |        |                |                        |                     |                   |
| LTCs details:        |                                                                                                                                                                                                                                                                                                                                                                    |        |                |                        |                     |                   |
| Dose of Intervention | <p>Dose actually delivered:<br/>           Number of sessions:    Session Duration (hours):    Total hours:<br/>           Duration Intervention Delivered Over:</p> <p>Dose actually received (specifically for groups):<br/>           Number of sessions:    Session Duration (hours):    Total hours:<br/>           Duration Intervention Delivered Over:</p> |        |                |                        |                     |                   |

|                          |                                                                                                                                                                                                                                                                                                                                                                                                                                                                                |
|--------------------------|--------------------------------------------------------------------------------------------------------------------------------------------------------------------------------------------------------------------------------------------------------------------------------------------------------------------------------------------------------------------------------------------------------------------------------------------------------------------------------|
|                          | <p>Was the dose delivered <math>\geq</math> anticipated clinically effective dose: Yes <input type="checkbox"/> No <input type="checkbox"/> Unclear <input type="checkbox"/></p> <p>Details:</p> <p>Further author comments on dose:</p>                                                                                                                                                                                                                                       |
| Fidelity of Intervention | <p>Was there fidelity around the dose in the trial?: Yes <input type="checkbox"/> No <input type="checkbox"/> Unclear <input type="checkbox"/></p> <p>Was fidelity reported on in?: Yes <input type="checkbox"/> No <input type="checkbox"/> Unclear <input type="checkbox"/></p> <p>Do the authors discuss the impact of fidelity?: Yes <input type="checkbox"/> No <input type="checkbox"/> Unclear <input type="checkbox"/></p> <p>Further author comments on fidelity:</p> |
| Primary Outcome Result   | <p>Was the Primary Outcome Statistically Significant: Yes <input type="checkbox"/> No <input type="checkbox"/></p> <p>Details:</p> <p>Was the Primary Outcome Clinically Significant: Yes <input type="checkbox"/> No <input type="checkbox"/> Unclear <input type="checkbox"/></p> <p>Details:</p>                                                                                                                                                                            |

**Cochrane Risk of Bias Assessment:**

|                     |                                                                                                                                                                                                                                                                                                                                                                                                                                                                                                                                                                 |
|---------------------|-----------------------------------------------------------------------------------------------------------------------------------------------------------------------------------------------------------------------------------------------------------------------------------------------------------------------------------------------------------------------------------------------------------------------------------------------------------------------------------------------------------------------------------------------------------------|
| 1. Selection Bias   | <p>Randomisation and Allocation Concealment</p> <p>Your assessment of this bias: 'Low risk' <input type="checkbox"/> 'High risk' <input type="checkbox"/> 'Unclear risk' <input type="checkbox"/></p>                                                                                                                                                                                                                                                                                                                                                           |
| 2. Performance Bias | <p>Blinding of Participants and Clinical staff</p> <p>Your assessment of this bias: 'Low risk' <input type="checkbox"/> 'High risk' <input type="checkbox"/> 'Unclear risk' <input type="checkbox"/></p>                                                                                                                                                                                                                                                                                                                                                        |
| 3. Detection Bias   | <p>Blinding of Outcome Assessors</p> <p>Your assessment of this bias: 'Low risk' <input type="checkbox"/> 'High risk' <input type="checkbox"/> 'Unclear risk' <input type="checkbox"/></p>                                                                                                                                                                                                                                                                                                                                                                      |
| 4. Attrition Bias   | <p>Incomplete Outcome data – for each outcome</p> <p>Outcome:</p> <p>Attrition reported: Yes <input type="checkbox"/> No <input type="checkbox"/></p> <p>Exclusions reported: Yes <input type="checkbox"/> No <input type="checkbox"/></p> <p>% dropped out:</p> <p>Intervention Group:                      Control Group:</p> <p>Reasons for LTFU:</p> <p>Intervention Group:</p> <p>Control Group:</p> <p>Your assessment of this bias: 'Low risk' <input type="checkbox"/> 'High risk' <input type="checkbox"/> 'Unclear risk' <input type="checkbox"/></p> |
| 5. Reporting Bias   | <p>Selective Outcome Reporting</p> <p>Your assessment of this bias: 'Low risk' <input type="checkbox"/> 'High risk' <input type="checkbox"/> 'Unclear risk' <input type="checkbox"/></p>                                                                                                                                                                                                                                                                                                                                                                        |

|                          |                                                                                                                                                                              |
|--------------------------|------------------------------------------------------------------------------------------------------------------------------------------------------------------------------|
| 6. Other Sources of Bias | Bias due to other problems<br>Your assessment of this bias: 'Low risk' <input type="checkbox"/> 'High risk' <input type="checkbox"/> 'Unclear risk' <input type="checkbox"/> |
|--------------------------|------------------------------------------------------------------------------------------------------------------------------------------------------------------------------|
